# Supplementary material
Source: HighWire-hosted journal article supplement (https://www.cmajopen.ca/highwire/filestream/81098/field_highwire_adjunct_files/0/2018-0026-1-at.pdf)
Supplement: 2018-0026-1-at.pdf [file 2018-0026-1-at.pdf]

## **Appendix 1 (as supplied by the authors): Nova Scotia Trauma Registry definition of potential organ donor**

The Nova Scotia Trauma Registry (NSTR) definition of a potential organ donor was any trauma patient in the NSTR who died in hospital and met the two criteria listed below:

1. Had at least one of the following ICD-10-CA injury codes:
  - a. S06 - Intracranial injury
  - b. S07 - Crushing injury of head
  - c. S08 - Traumatic amputation of part of head
  - d. S09 - Other and unspecified injuries of the head
  - e. S02.0 - Fracture of vault of skull
  - f. S02.1 - Fracture of base of skull
  - g. S02.7 - Multiple fractures involving skull and facial bones
  - h. S02.89 - Fractures of other unspecified skull and facial bones
  - i. T71 - Asphyxiation (Note: use of this code in the NSTR began in April 2011)
2. Received mechanical ventilation at any time during hospital stay.
